# Supplementary material for: Studies of molecular structure, hydrogen bonding and chemical activity of a nitrofurantoin-l-proline cocrystal: a combined spectroscopic and quantum chemical approach
Source: Royal Society of Chemistry journal article supplement (doi:10.1039/c6ra13035f), 2016-01-01
Supplement: c6ra13035f1.pdf [file c6ra13035f1.pdf]

†*ELECTRONIC SUPPLEMENTARY MATERIAL-RSC Adv.*

## **Studies of molecular structure, hydrogen bonding and chemical activity of nitrofurantoin-L-proline cocrystal: A combined spectroscopic and quantum chemical approach**

Jaya Pandey<sup>1</sup>, Preeti prajapati<sup>1</sup>, Manishkumar R. Shimpi<sup>2</sup>, Poonam Tandon<sup>1\*</sup>, Sitaram P. Velaga<sup>2\*</sup>, Anubha Srivastava<sup>1</sup> and Kirti Sinha<sup>1</sup>

<sup>1</sup>*Department of Physics, University of Lucknow, Lucknow-226007*

<sup>2</sup>*Luleå Technical University, Department of Health Science, S-971 87, Luleå, Sweden*

Overlapped figure of optimized structure of model I and model II using both functional B3LYP, WB97XD is given in Fig.S1. Comparison of calculated spectra of model I using functional B3LYP and WB97XD with experimental spectra of NTF-LP cocrystal and comparison of calculated spectra of both models with B3LYP functional with experimental spectra of NTF-LP cocrystal is shown in Fig.S2. Optimized structure of conformer III of NTF-LP cocrystal is shown in Fig.S3. Comparison and overlapping of the optimized structure of conformer I and conformer II is shown in Fig.S4. Fig.S5 shows the intermolecular interactions of NTF and LP with its neighboring molecules observed in bulk solid state. Comparison of experimental and calculated IR spectra of NTF is illustrated in Fig.S6. In Fig.S7 comparison of experimental and a calculated Raman spectrum of NTF is shown. Comparison of experimental and calculated IR spectra of LP is illustrated in Fig.S8. In Fig.S9 comparison of experimental and calculated Raman spectra of LP is shown. Fig.S10 shows the AIM figure of NTF whereas MEPS map of NTF is shown in Fig.S11. The comparison of HOMO-LUMO plot of NTF, LP conformer I and II of NTF-LP cocrystal with orbitals involved in electronic transitions in isolated (gaseous) phase is shown in Fig.S12. Table S1 shows the comparison of geometrical parameters of conformers I and II. Table S2 shows the comparison of observed solid state FT-IR spectra, FT-Raman spectra and calculated harmonic vibrational wavenumbers of NTF. Comparison of FT-IR and FT-Raman spectra and calculated Vibrational wavenumbers of LP is shown in Table S3. AIM calculation to determine characteristics of hydrogen bonds and ellipticity index ( $\epsilon$ ) around bond critical point (BCP) of NTF-LP cocrystal is shown in Table S4. Table S5 shows the local reactivity descriptors of NTF molecule explaining their reactivity. The local reactivity descriptors explaining reactivity of LP molecule are shown in Table S6.

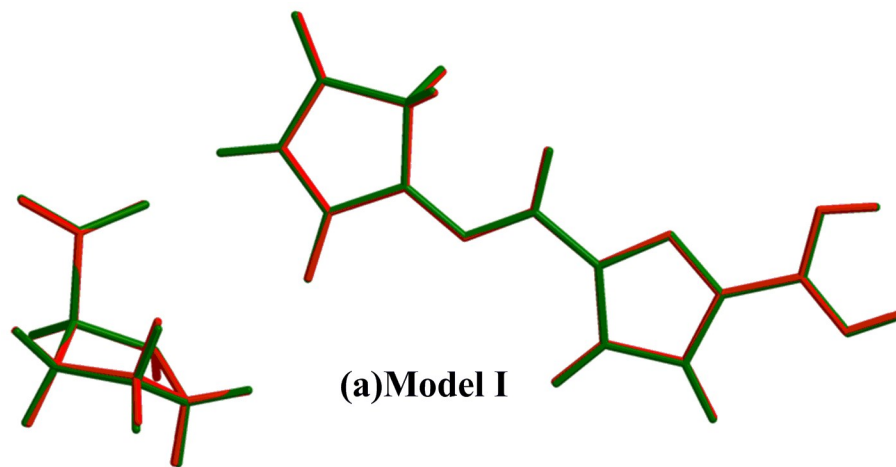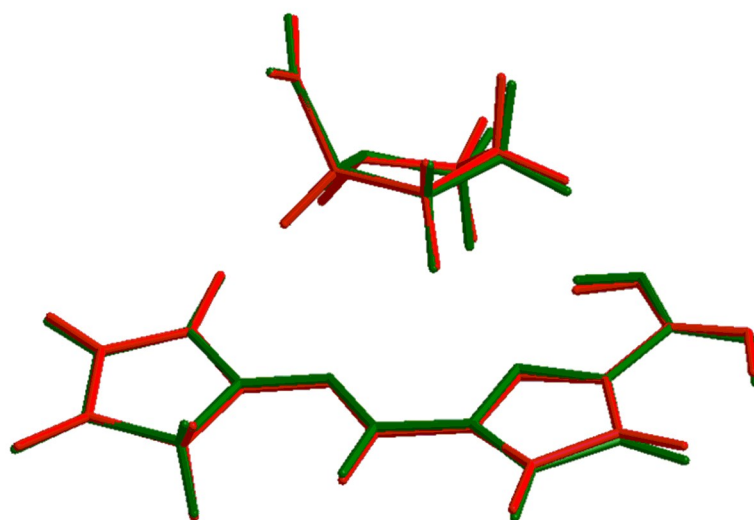

**Fig.S1:** (a) Overlapped figure of optimized structure of model I (a) and model II (b) using B3LYP (green) and WB97XD (red) functional.

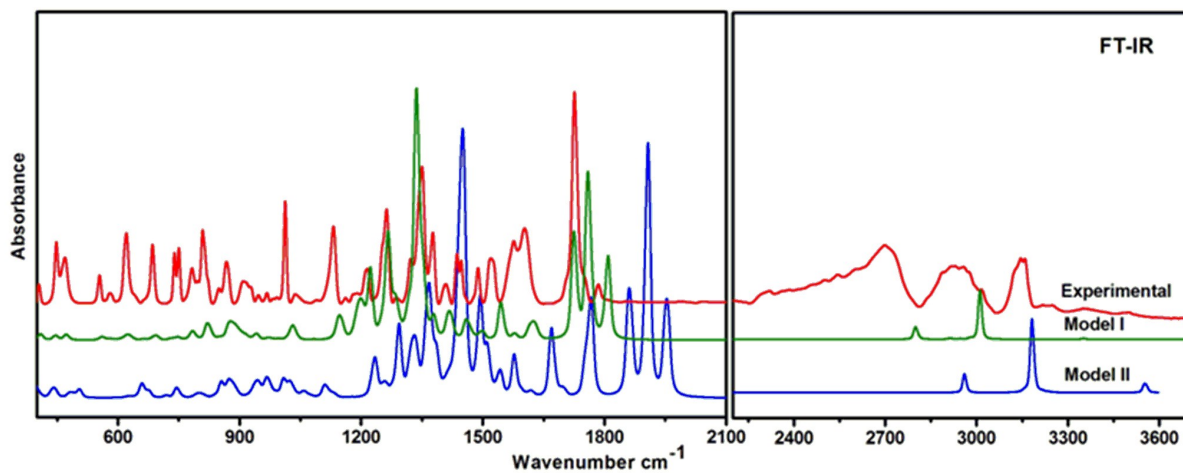

(a)

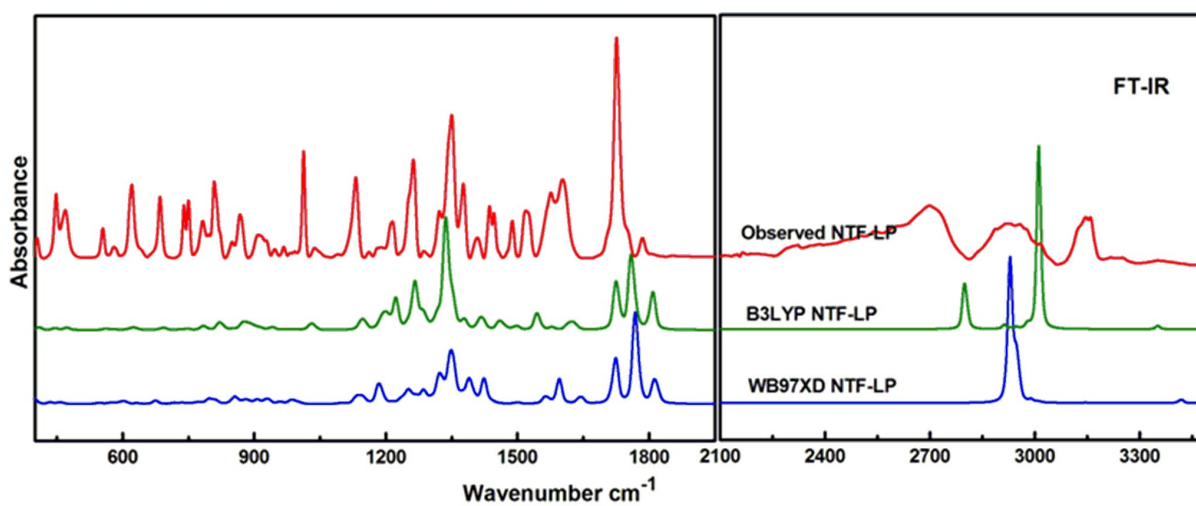

(b)

**Fig.S2:** (a) The comparison spectra of model I and model II using B3LYP and (b) The comparison spectra of model I and model II using B3LYP and WB97XD functional with observed spectra of NTF-LP cocrystal.

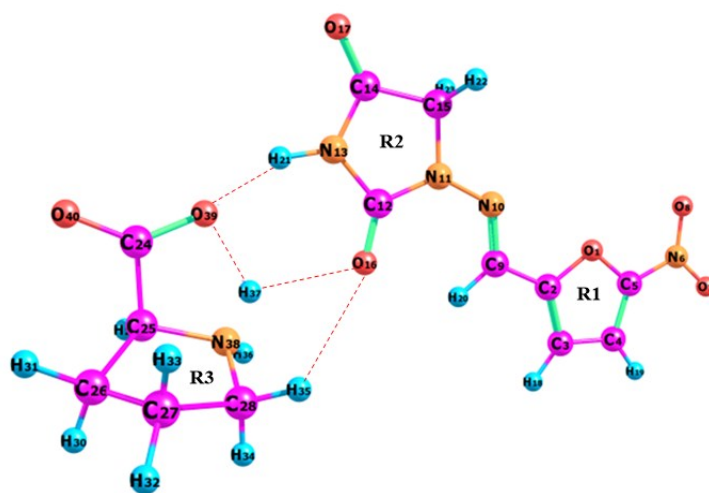

**Fig.S3:** Optimized structure of conformer III of NTF-LP cocrystal.

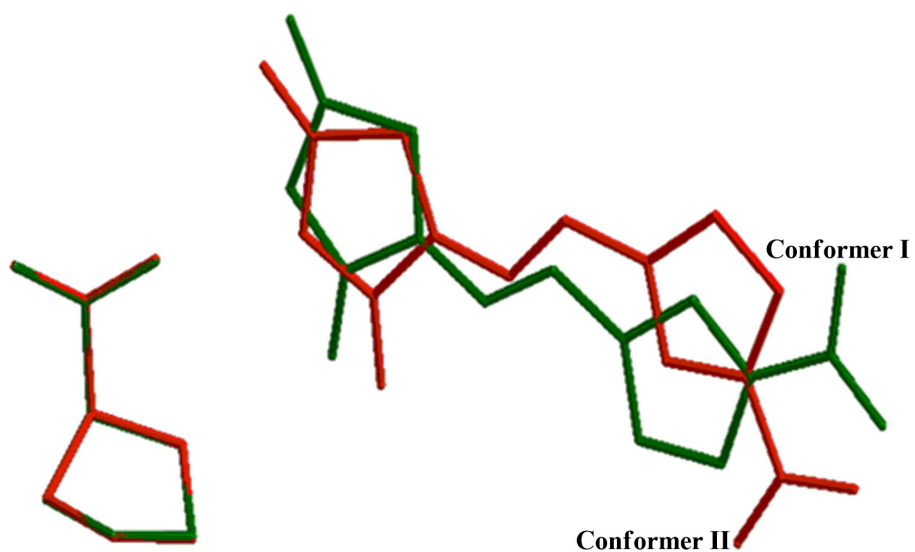

**Fig.S4:** Comparison of optimized structure of conformer I (green) and conformer II (red).

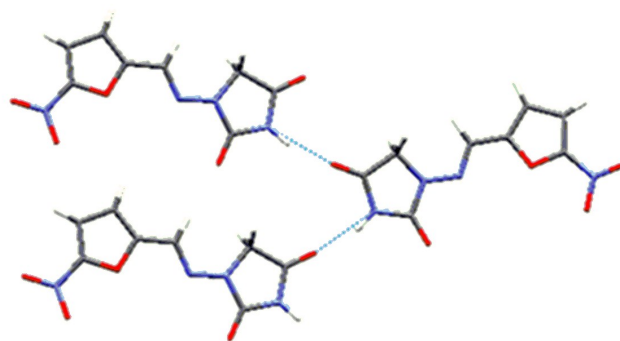

**NTF interactions with neighbouring molecules**

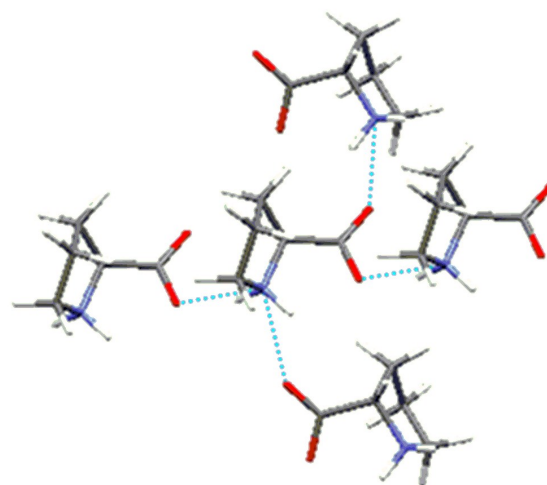

**LP interactions with neighbouring molecules**

**Fig.S5:** Intermolecular interactions of NTF and LP with their neighbouring molecules in solid state.

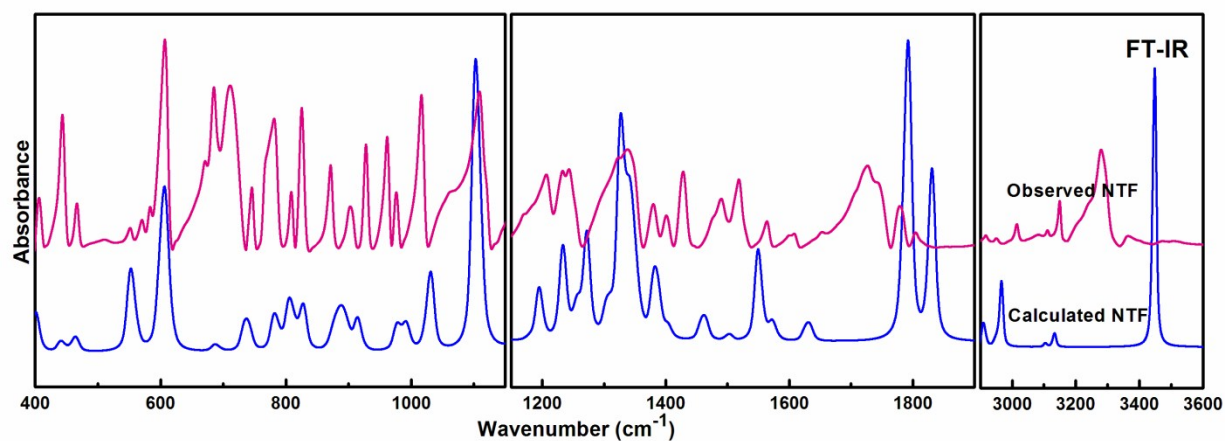

**Fig.S6:** Observed and calculated (scaled) FT-IR spectra of NTF in the region, 400-1150  $\text{cm}^{-1}$ , 1150-2000  $\text{cm}^{-1}$  and 2850-3600  $\text{cm}^{-1}$ .

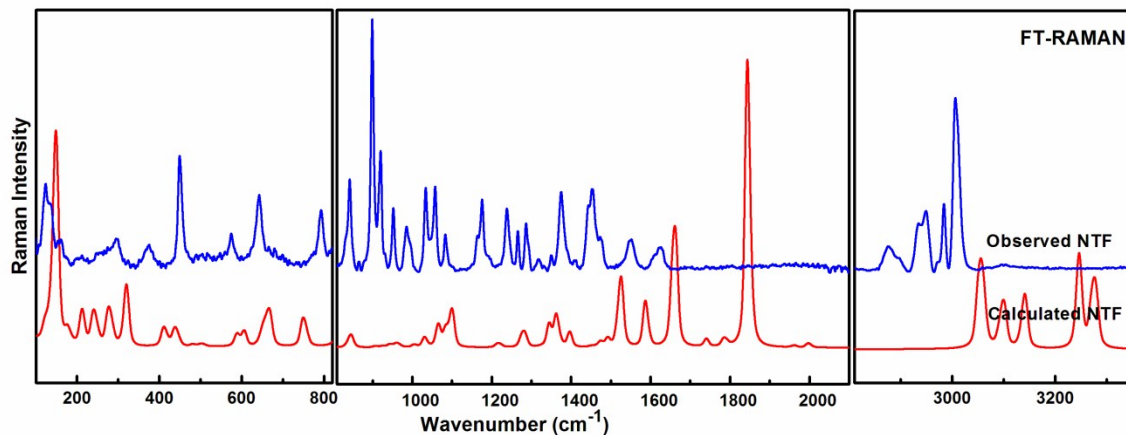

**Fig.S7:** Observed and calculated (scaled) FT-Raman spectra of NTF in the region, 100-800 cm<sup>-1</sup>, 800-2100 cm<sup>-1</sup> and 2100-3380 cm<sup>-1</sup>.

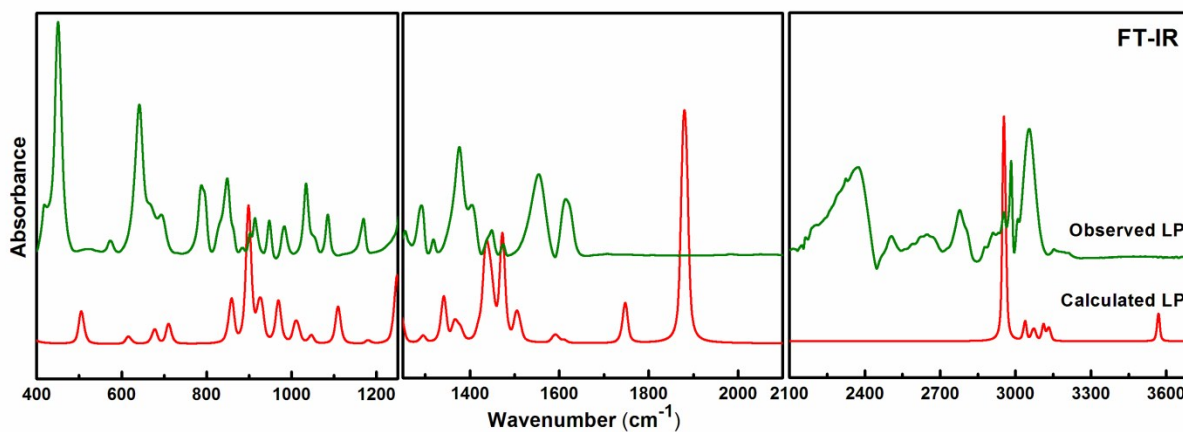

**Fig.S8:** Observed and calculated (scaled) FT-IR spectra of LP in the region, 400-1200 cm<sup>-1</sup>, 1200-2100 cm<sup>-1</sup> and 2100-3650 cm<sup>-1</sup>.

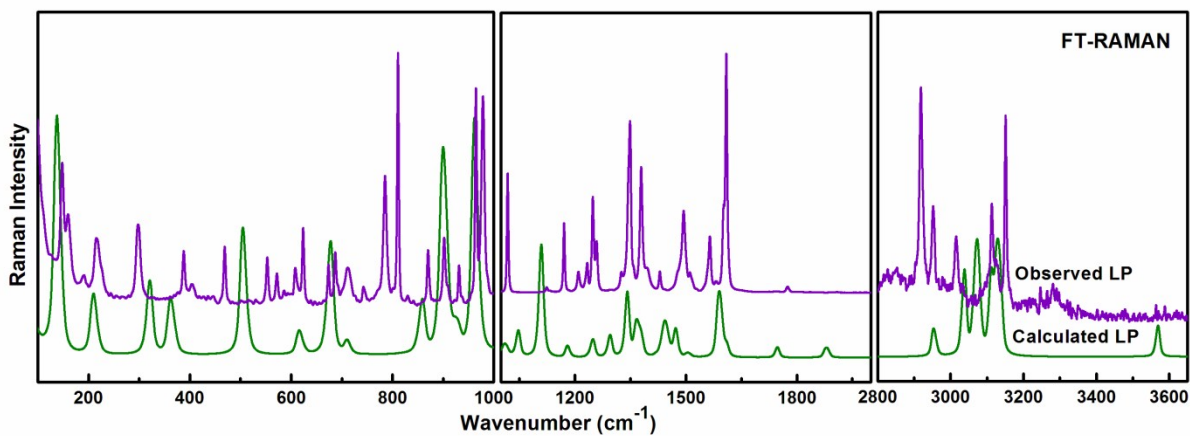

**Fig.S9:** Observed and calculated (scaled) FT-Raman spectra of LP in the region, 100-1000  $\text{cm}^{-1}$ , 1000-2800  $\text{cm}^{-1}$  and 2800–3600  $\text{cm}^{-1}$ .

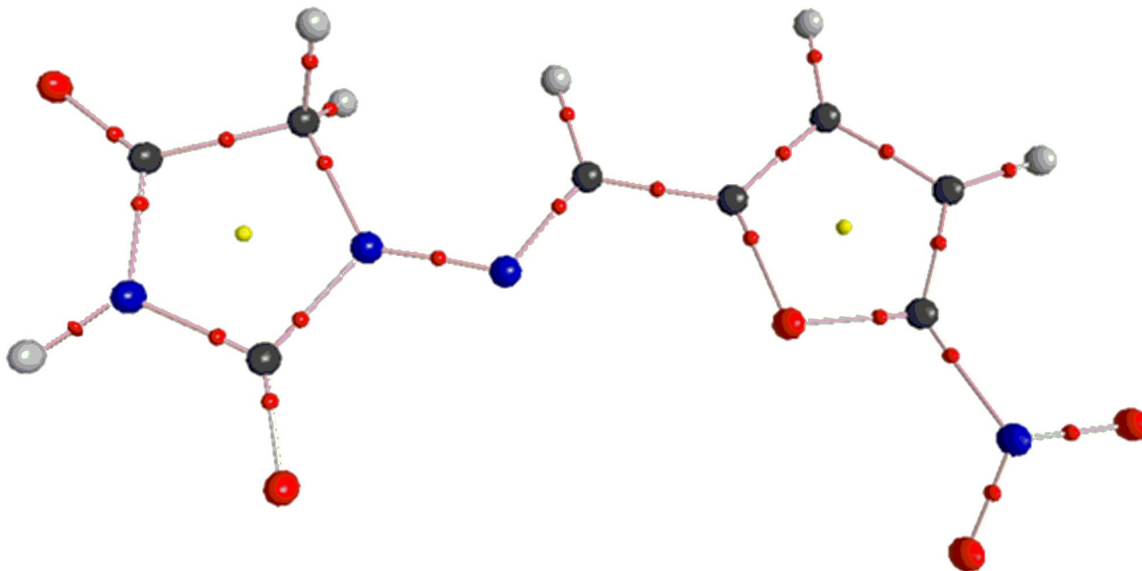

**Fig.S10:** Molecular graph of NTF using AIM calculation: bond path (pink lines), bond critical point (small red spheres) and ring critical points (small yellow spheres).

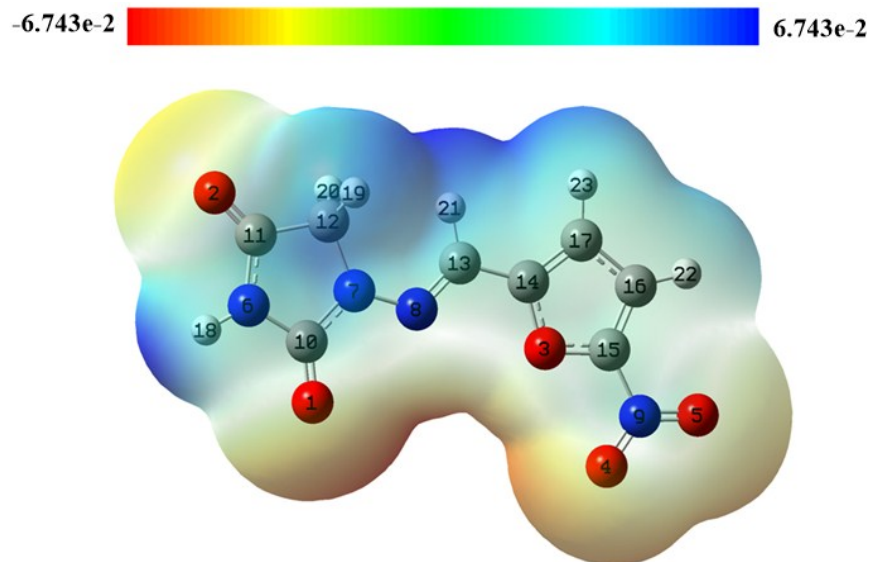

**Fig.S11:** Molecular electrostatic potential (MESP) mapped on iso-density surface in the range  $-6.743e-2$  (red) to  $+6.743e-2$  (blue) of NTF calculated at B3LYP/6-311++G(d,p) level of theory.

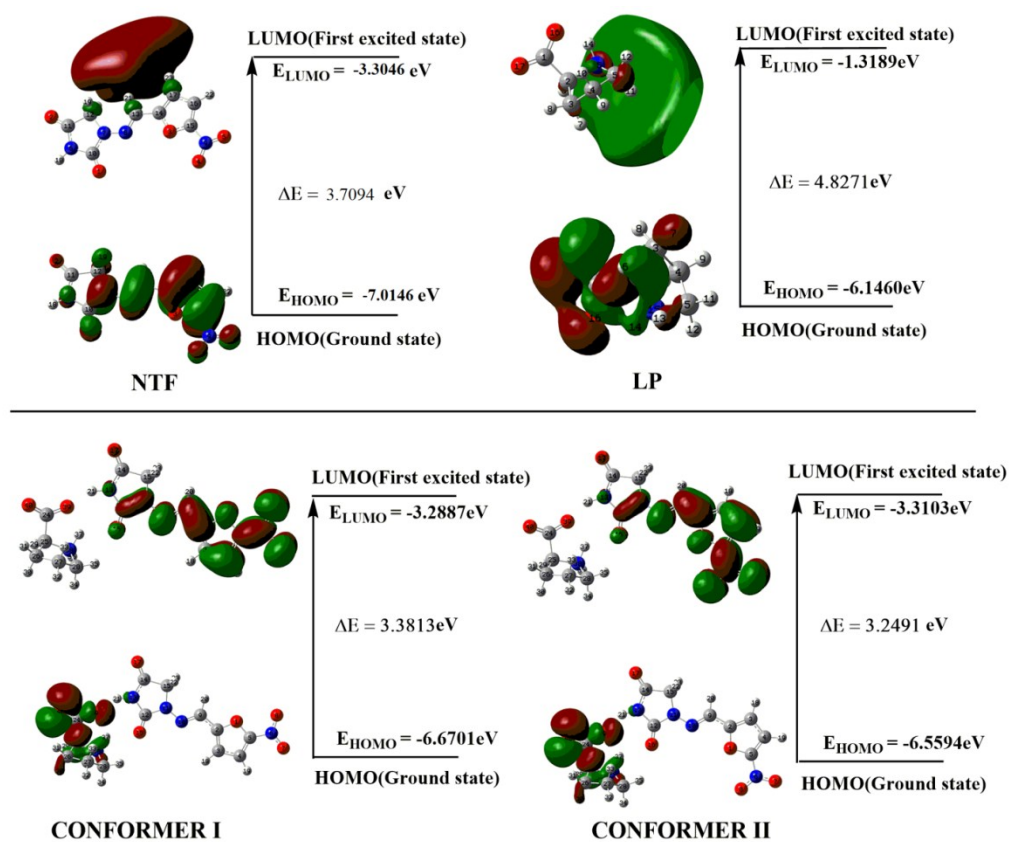

**Fig.S12.** HOMO-LUMO plot of NTF, LP conformer I and II of NTF-LP cocrystal with orbitals involved in electronic transitions in isolated (gaseous) phase



**Table S1** Comparison of geometrical parameters, bond length, bond angle, dihedral angle for conformer I and conformer II of NTF-LP cocrystal calculated by B3LYP/6-311++G(d,p).

| Parameters             | Optimized conformers |         | Parameters                | Optimized conformers |          |
|------------------------|----------------------|---------|---------------------------|----------------------|----------|
|                        | I                    | II      |                           | I                    | II       |
| <b>Bond length (Å)</b> |                      |         | <b>Dihedral angle (°)</b> |                      |          |
| O1-C2                  | 1.364                | 1.359   | C5-O1-C2-C3               | -0.002               | -0.020   |
| O1-C5                  | 1.350                | 1.350   | C5-O1-C2-C9               | 179.983              | 179.878  |
| C2-C3                  | 1.378                | 1.379   | C2-O1-C5-C4               | 0.004                | 0.003    |
| C2-C9                  | 1.443                | 1.442   | C2-O1-C5-N6               | -179.946             | 179.966  |
| C3-C4                  | 1.415                | 1.417   | O1-C2-C3-C4               | -0.001               | 0.029    |
| C3-H18                 | 1.078                | 1.079   | O1-C2-C3-H18              | -179.960             | 179.986  |
| C4-C5                  | 1.368                | 1.366   | C9-C2-C3-C4               | -179.982             | -179.855 |
| C4-H19                 | 1.077                | 1.077   | C9-C2-C3-H18              | 0.059                | 0.102    |
| C5-N6                  | 1.429                | 1.431   | O1-C2-C9-N10              | -179.797             | -0.396   |
| N6-O7                  | 1.231                | 1.224   | O1-C2-C9-H20              | 0.199                | 179.721  |
| N6-O8                  | 1.226                | 1.231   | C3-C2-C9-N10              | 0.184                | 179.479  |
| C9=N10                 | 1.287                | 1.286   | C3-C2-C9-H20              | -179.821             | -0.404   |
| C9-H20                 | 1.090                | 1.091   | C2-C3-C4-C5               | 0.003                | -0.026   |
| N10-N11                | 1.338                | 1.337   | C2-C3-C4-H19              | 179.996              | 179.958  |
| N11-C12                | 1.403                | 1.404   | H18-C3-C4-C5              | 179.961              | -179.982 |
| N11-C15                | 1.459                | 1.459   | H18-C3-C4-H19             | -0.047               | 0.002    |
| C12-N13                | 1.386                | 1.387   | C3-C4-C5-O1               | -0.005               | 0.014    |
| C12=O16                | 1.212                | 1.210   | C3-C4-C5-N6               | 179.937              | -179.942 |
| N13-C14                | 1.379                | 1.378   | H19-C4-C5-O1              | -179.998             | -179.970 |
| N13-H21                | 1.039                | 1.039   | H19-C4-C5-N6              | -0.056               | 0.073    |
| C14-C15                | 1.534                | 1.534   | O1-C5-N6-O7               | 179.939              | -0.158   |
| C14=O17                | 1.203                | 1.204   | O1-C5-N6-O8               | -0.052               | 179.859  |
| C15-H22                | 1.094                | 1.094   | C4-C5-N6-O7               | 0.000                | 179.796  |
| C15-H23                | 1.094                | 1.094   | C4-C5-N6-O8               | -179.991             | -0.187   |
| H21-O39                | 1.710                | 1.710   | C2-C9-N10-N11             | 179.999              | -179.934 |
| C24-C25                | 1.576                | 1.576   | H20-C9-N10-N11            | 0.004                | -0.061   |
| C24-O39                | 1.273                | 1.272   | C9-N10-N11-C12            | 179.952              | 179.161  |
| C24=O40                | 1.222                | 1.223   | C9-N10-N11-C15            | -0.020               | 0.258    |
| C25-C26                | 1.532                | 1.533   | N10-N11-C12-N13           | 179.866              | -179.592 |
| C25-H29                | 1.090                | 1.090   | N10-N11-C12-O16           | -0.055               | 0.432    |
| C25-N38                | 1.525                | 1.524   | C15-N11-C12-N13           | -0.159               | -0.517   |
| C26-C27                | 1.538                | 1.538   | C15-N11-C12-O16           | 179.921              | 179.507  |
| C26-H30                | 1.095                | 1.095   | N10-N11-C15-C14           | -180.022             | 179.273  |
| C26-H31                | 1.089                | 1.089   | N10-N11-C15-H22           | -61.798              | -62.496  |
| C27-C28                | 1.530                | 1.530   | N10-N11-C15-H23           | 61.768               | 61.184   |
| C27-H32                | 1.091                | 1.091   | C12-N11-C15-C14           | 0.005                | 0.294    |
| C27-H33                | 1.093                | 1.093   | C12-N11-C15-H22           | 118.228              | 118.525  |
| C28-H34                | 1.092                | 1.092   | C12-N11-C15-H23           | -118.205             | -117.795 |
| C28-H35                | 1.088                | 1.088   | N11-C12-N13-C14           | 0.272                | 0.557    |
| C28-N38                | 1.509                | 1.509   | N11-C12-N13-H21           | 179.441              | 179.008  |
| H36-N38                | 1.017                | 1.017   | O16-C12-N13-C14           | -179.809             | -179.468 |
| H37-N38                | 1.059                | 1.056   | O16-C12-N13-H21           | -0.639               | -1.016   |
| <b>Bond Angle (°)</b>  |                      |         |                           |                      |          |
| C2-O1-C5               | 106.285              | 106.241 | C12-N13-C14-C15           | -0.268               | -0.372   |
| O1-C2-C3               | 110.026              | 109.996 | C12-N13-C14-O17           | 179.743              | 179.620  |
| O1-C2-C9               | 115.642              | 119.602 | H21-N13-C14-C15           | -179.370             | -178.688 |
| C3-C2-C9               | 134.332              | 130.403 | H21-N13-C14-O17           | 0.641                | 1.304    |

|             |         |         |                  |          |          |
|-------------|---------|---------|------------------|----------|----------|
| C2-C3-C4    | 106.539 | 106.672 | C12-N13-H21-O39  | -4.860   | -5.268   |
| C2-C3-H18   | 125.485 | 126.078 | C14-N13- H21-O39 | 174.190  | 172.957  |
| C4-C3-H18   | 127.976 | 127.249 | N13-C14-C15-N11  | 0.152    | 0.041    |
| C3-C4-C5    | 105.455 | 105.032 | N13-C14-C15-H22  | -119.540 | -119.719 |
| C3-C4-H19   | 128.756 | 128.925 | N13-C14-C15-H23  | 119.841  | 119.703  |
| C5-C4-H19   | 125.789 | 126.043 | O17-C14-C15-N11  | -179.859 | -179.952 |
| O1-C5-C4    | 111.694 | 112.059 | O17-C14-C15-H22  | 60.449   | 60.289   |
| O1-C5-N6    | 117.530 | 117.591 | O17-C14-C15-H23  | -60.170  | -60.290  |
| C4-C5-N6    | 130.776 | 130.351 | N13-H21-O39-C24  | 131.802  | 138.455  |
| C5-N6-O7    | 115.962 | 118.311 | O39-C24-C25-C26  | 121.712  | 121.182  |
| C5-N6-O8    | 118.210 | 115.827 | O39-C24-C25-H29  | -110.637 | -111.396 |
| O7-N6-O8    | 125.828 | 125.862 | O39-C24-C25-N38  | 7.145    | 6.465    |
| C2-C9-N10   | 119.112 | 120.840 | O40-C24-C25-C26  | -58.424  | -58.950  |
| C2-C9-H20   | 116.425 | 115.223 | O40-C24-C25-H29  | 69.228   | 68.473   |
| N10-C9-H20  | 124.463 | 123.936 | O40-C24-C25-N38  | -172.991 | -173.666 |
| C9-N10-N11  | 119.183 | 119.203 | C25-C24-O39-H21  | -137.071 | -142.480 |
| N10-N11-C12 | 120.235 | 120.029 | O40-C24-O39-H21  | 43.091   | 37.677   |
| N10-N11-C15 | 128.075 | 128.357 | C24-C25-C26-C27  | -87.827  | -88.487  |
| C12-N11-C15 | 111.690 | 111.607 | C24-C25-C26-H30  | 153.638  | 153.036  |
| N11-C12-N13 | 106.290 | 106.310 | C24-C25-C26-H31  | 33.920   | 33.346   |
| N11-C12-O16 | 126.428 | 126.399 | H29-C25-C26-C27  | 147.112  | 146.670  |
| N13-C12-O16 | 127.283 | 127.291 | H29-C25-C26-H30  | 28.577   | 28.192   |
| C12-N13-C14 | 113.498 | 113.501 | H29-C25-C26-H31  | -91.142  | -91.498  |
| C12-N13-H21 | 119.854 | 119.566 | N38-C25-C26-C27  | 27.701   | 27.434   |
| C14-N13-H21 | 126.641 | 126.912 | N38-C25-C26-H30  | -90.834  | -91.044  |
| N13-C14-C15 | 106.230 | 106.239 | N38-C25-C26-H31  | 149.448  | 149.266  |
| N13-C14-O17 | 127.864 | 127.998 | C24-C25-N38-C28  | 115.036  | 115.687  |
| C15-C14-O17 | 125.907 | 125.763 | C24-C25-N38-H36  | -118.849 | -118.337 |
| N11-C15-C14 | 102.292 | 102.341 | C24-C25-N38-H37  | -2.960   | -2.412   |
| N11-C15-H22 | 112.350 | 112.401 | C26-C25-N38-C28  | -5.686   | -5.149   |
| N11-C15-H23 | 112.353 | 112.358 | C26-C25-N38-H36  | 120.429  | 120.827  |
| C14-C15-H22 | 110.268 | 110.230 | C26-C25-N38-H37  | -123.682 | -123.248 |
| C14-C15-H23 | 110.255 | 110.126 | H29-C25-N38-C28  | -127.779 | -127.047 |
| H22-C15-H23 | 109.168 | 109.221 | H29-C25-N38-H36  | -1.664   | -1.072   |
| N13-H21-O39 | 151.592 | 150.761 | H29-C25-N38-H37  | 114.225  | 114.854  |
| C25-C24-O39 | 112.442 | 112.629 | C25-C26-C27-C28  | -39.586  | -39.682  |
| C25-C24-O40 | 116.316 | 116.146 | C25-C26-C27-H32  | -160.383 | -160.502 |
| O39-C24-O40 | 131.241 | 131.225 | C25-C26-C27-H33  | 78.373   | 78.170   |
| C24-C25-C26 | 113.840 | 113.809 | H30-C26-C27-C28  | 79.409   | 79.277   |
| C24-C25-H29 | 108.653 | 108.580 | H30-C26-C27-H32  | -41.388  | -41.544  |
| C24-C25-N38 | 106.233 | 106.598 | H30-C26-C27-H33  | -162.632 | -162.871 |
| C26-C25-H29 | 113.586 | 113.477 | H31-C26-C27-C28  | -158.759 | -158.919 |
| C26-C25-N38 | 104.605 | 104.554 | H31-C26-C27-H32  | 80.444   | 80.261   |
| H29-C25-N38 | 109.549 | 109.481 | H31-C26-C27-H33  | -40.800  | -41.067  |
| C25-C26-C27 | 103.655 | 103.692 | C26-C27-C28-H34  | -80.173  | -79.746  |
| C25-C26-H30 | 111.056 | 111.030 | C26-C27-C28-H35  | 153.966  | 154.439  |
| C25-C26-H31 | 109.836 | 109.847 | C26-C27-C28-N38  | 35.662   | 36.050   |
| C27-C26-H30 | 110.388 | 110.332 | H32-C27-C28-H34  | 41.810   | 42.254   |
| C27-C26-H31 | 113.631 | 113.681 | H32-C27-C28-H35  | -84.051  | -83.562  |
| H30-C26-H31 | 108.257 | 108.241 | H32-C27-C28-N38  | 157.646  | 158.049  |
| C26-C27-C28 | 103.435 | 103.363 | H33-C27-C28-H34  | 161.690  | 162.203  |
| C26-C27-H32 | 113.229 | 113.260 | H33-C27-C28-H35  | 35.829   | 36.388   |
| C26-C27-H33 | 110.488 | 110.468 | H33-C27-C28-N38  | -82.475  | -82.002  |

|             |         |         |                 |          |          |
|-------------|---------|---------|-----------------|----------|----------|
| C28-C27-H32 | 111.468 | 111.512 | C27-C28-N38-C25 | -18.679  | -19.264  |
| C28-C27-H33 | 110.233 | 110.183 | C27-C28-N38-H36 | -145.518 | -146.052 |
| H32-C27-H33 | 107.965 | 108.024 | C27-C28-N38-H37 | 92.572   | 92.716   |
| C27-C28-H34 | 111.324 | 111.355 | H34-C28-N38-C25 | 99.484   | 98.882   |
| C27-C28-H35 | 115.376 | 115.522 | H34-C28-N38-H36 | -27.355  | -27.906  |
| C27-C28-N38 | 103.593 | 103.486 | H34-C28-N38-H37 | -149.266 | -149.138 |
| H34-C28-H35 | 109.708 | 109.568 | H35-C28-N38-C25 | -141.711 | -142.441 |
| H34-C28-N38 | 108.006 | 108.010 | H35-C28-N38-H36 | 91.450   | 90.772   |
| H35-C28-N38 | 108.401 | 108.467 | H35-C28-N38-H37 | -30.461  | -30.460  |
| C25-N38-C28 | 109.046 | 109.086 |                 |          |          |
| C25-N38-H36 | 113.594 | 113.609 |                 |          |          |
| C25-N38-H37 | 101.377 | 102.068 |                 |          |          |
| C28-N38-H36 | 112.331 | 112.193 |                 |          |          |
| C28-N38-H37 | 111.754 | 111.525 |                 |          |          |
| H36-N38-H37 | 108.259 | 107.940 |                 |          |          |
| H21-O39-C24 | 157.701 | 161.029 |                 |          |          |

**Table S2** Band Assignment of observed FT-IR, FT-Raman spectra and theoretical harmonic vibrational wavenumbers (in  $\text{cm}^{-1}$ ) of NTF.

| Unscaled DFT | Scaled DFT | IR   | Raman | Ped Assignment (%contribution)                                                                                    |
|--------------|------------|------|-------|-------------------------------------------------------------------------------------------------------------------|
| 3630         | 3447       | 3278 | -     | R2[v(NH)](100)                                                                                                    |
| 3279         | 3132       | 3149 | 3150  | R1[v(C4H)](96)                                                                                                    |
| 3248         | 3104       | 3110 | 3113  | R1[v(C3H)](96)                                                                                                    |
| 3095         | 2965       | 2950 | -     | [v(C9H)](99)                                                                                                      |
| 3076         | 2949       | -    | 2952  | R2[v <sub>as</sub> (CH <sub>2</sub> )](100)                                                                       |
| 3035         | 2911       | 2916 | 2918  | R2[v <sub>s</sub> (CH <sub>2</sub> )](99)                                                                         |
| 1871         | 1831       | 1805 | -     | R2[v(C12O)](65)+R2[v(C14O)](14)+ R2[δ'ring](6)+R2[v(NC12)](5)                                                     |
| 1830         | 1791       | 1780 | 1775  | R2[v(C14O)](64)+R2[v(C12O)](14) + R2[v(NC14)](7)                                                                  |
| 1660         | 1630       | 1652 | 1609  | [v(CN10)](55)+ρ[C9H](15)+ R1[v(C2C9)](15)+R1[v(C2C3)](6)                                                          |
| 1602         | 1574       | 1598 | 1582  | R1[v(C4C5)](30)+R1[v(C2C3)](15)+[v(NO8)](11)+[v(NO7)](9)+<br>[v(C9N)](8)+ δin[C3H](6)+ρ[C5N](5)                   |
| 1577         | 1551       | 1564 | 1564  | [v(NO8)](41)+ [v(NO7)](32)+R1[v(C2C3)](9)                                                                         |
| 1526         | 1502       | 1517 | 1511  | R1[v(C4C5)](29)+R1[δring](13)+ R1[v(C2C9)](12)+R1[v(C2C3)](12)+R1[v(C5N)](5)+<br>[v(C9N)](5)                      |
| 1484         | 1461       | 1475 | 1476  | R2[δin[CH <sub>2</sub> ]](92)                                                                                     |
| 1425         | 1404       | 1400 | 1429  | R1[v(C3C4)](17)+R1[v(OC2)](15)+R1[v(OC5)](12)+δin[C4H](10)+<br>R1[v(C2C3)](6) +ρ[C9H](6)+δin[C3H](5)+δin[C2OC](5) |
| 1404         | 1384       | 1380 | 1379  | ρ[C9H](12)+R2[v(N11C12)](11)+ω[CC15N](8) +R1[v(C2C3)](8)+R1[v(C3C4)](7)+R2[v(NN)](6)+<br>δin[C3H](5)              |
| 1375         | 1356       | -    | -     | R2[δin(NH)](36)+R2[v(NC14)](17)+ρ[C9H](7)                                                                         |
| 1363         | 1345       | 1338 | 1349  | ρ[C9H](22)+[v(NO7)](19)+R1[v(C5N)](14)+ [v(NO8)](11)+ δsci[C5NO](10)+R1[v(C3C4)](7)                               |
| 1346         | 1329       | 1323 | 1325  | ω[CC15N](21)+δin[N13CH](20)+R2[v(C12N13)](13)+ R2[v(N11C12)](10)+ρ[HC9](5)                                        |
| 1323         | 1306       |      |       | R2[v(NC14)](19)+R2[v(C14C)](19)+ω[CC15N](16)+R2[δin[C=O17]](10)+R2[v(C12N13)](7)+<br>R2[δring](6)                 |
| 1288         | 1272       | -    | -     | R1[v(C3C4)](28)+R1[v(C2C9)](11)+R1[v(OC2)](10)+[v(NO7)](8)+δin[C3H](7)+<br>[v(NO8)](6)+ρ[C9H](6)                  |
| 1270         | 1255       | 1243 | 1258  | R2[v(NN)](26)+R2[v(NC15)](13)+R1[v(OC5)](10)+R1[v(OC2)](8)+R2[δin[NN]](6)+δin[C4H](5)+                            |

|      |      |      |      |                                                                                                                                    |
|------|------|------|------|------------------------------------------------------------------------------------------------------------------------------------|
|      |      |      |      | R1[δ'ring] (5)                                                                                                                     |
| 1248 | 1233 | 1232 | 1232 | R1[v(OC5)](25)+R2[v(NN)](16)+R1[δ'ring](10)+R1[v(OC2)](9)+R1[v(C5N)](8)+R2[v(NC15)](5)+R1[v(C2C3)](5)                              |
| 1209 | 1196 | 1206 | 1209 | ω[CC15N](23)+R2[v(NC12)](21) +R2[v(NC15)] (21)+R2[v(NC14)](5)                                                                      |
| 1192 | 1179 |      |      | δin[C3H](31)+δin[C4H](21)+ R1[v(C5N)](9)+R1[δ'ring](7)+ R1[v(OC5)](5)+R1[v(C2C9)](5)                                               |
| 1191 | 1178 | 1168 | 1169 | γ[CC15N] (96)                                                                                                                      |
| 1115 | 1104 | 1108 | -    | R2[v(C12N13)](37)+ R2[v(NC14)](17)+ δin[NC12O] (10) +R2[δin[NH]](10)<br>+R2[v(NC15)](7)+R2[v(C14C)] (5)                            |
| 1038 | 1030 | 1016 | -    | R1[δin[C4H](38)+R1[δin[C3H](26)+R1[v(C3C4)](24)                                                                                    |
| 1014 | 1007 | -    | -    | ρ[CC15N](71)+ δoop[C14O] (15) +R2[τring] (6)                                                                                       |
| 1000 | 993  | -    | -    | R1[v(OC2)](44)+R1[δ'ring](13)+R1[v(OC5)](9)+R1[v(C2C9)](8)                                                                         |
| 986  | 979  | 976  | 978  | R1[δring](42)+R1[v(OC5)](11)+R1[v(C4C5)](9)+R1[v(C5N)](8)+R1[v(OC2)](6)+R1[v(C2C3)](5)                                             |
| 921  | 915  | 902  | 901  | ω[C9H](54) +τ[C9N] (24)+δoop[C3H](6) +R1[δoop[C4H] (5)                                                                             |
| 904  | 899  |      |      | R1[δoop[C4H] (60)+δoop[C3H](18)+R1[τring](12)+ω[C9H](5)                                                                            |
| 892  | 887  |      |      | R2[v(C14C)](54)+R2[v(NC14)](18)+δin[N13CH](7)                                                                                      |
| 879  | 874  | 871  | 869  | R1[δ'ring](17)+R2[δin[NN]](17)+δ[C9CN](14)+R2[v(NC15)](12)+R2[δ'ring](9)+R2[v(NN)](8)+R2[v(NC12)](7)                               |
| 831  | 826  | 825  |      | δsci[C5NO](59)+R1[δ'ring](17)+R1[δring](7)                                                                                         |
| 811  | 807  | 807  | 811  | δoop[C3H](69)+δoop[C4H] (19)                                                                                                       |
| 787  | 783  | 781  | 785  | R2[v(NC12)](22)+R1[δ'ring](15)+R1[δring](12)+R2[δ'ring](8)+R1[δ(C2C9)](7)+δin[NC12O](5)+δsci[C5NO](5)                              |
| 741  | 738  | 746  | -    | δoop[C=O16](70)+R2[τ'ring](13)+R2[τring](8)                                                                                        |
| 738  | 736  |      |      | δoop[C5N](66)+δoop[CN](15)+R1[τ'ring](10)                                                                                          |
| 690  | 689  | 684  | 686  | R2[δring](26)+R2[v(NC15)](16)+δin[NC12O](11)+R2[δ'ring](10)+δin[NNC](10)+δin[OC14CN](6)+R2[v(C14C)](5)                             |
| 688  | 686  |      |      | R1[τ'ring](35)+δoop[C2C9](33)+R1[τring](24)                                                                                        |
| 616  | 615  | -    | 623  | δin[OC14CN](18)+R2[δ'ring](15)+δin[NC12O](14)+R2[δring](11)+δin[NN](9)+R2[δin[NN]](6)                                              |
| 608  | 607  | -    | -    | δoop[C=O17](40)+δoop[NH](38)+R2[τring](12)+ρ[CC15N](7)                                                                             |
| 603  | 602  | 607  | 608  | R2[δ'ring](25)+R2[δring](19)+R2[v(C12N13)](10)+R1[v(C2C9)](5)                                                                      |
| 594  | 593  |      |      | R1[τring] (53)+R1[τ'ring](24)+δoop[CN](17)                                                                                         |
| 554  | 554  | 582  | 571  | δoop[NH](54)+R2[δoop(C=O17)](26)+ρ[CC15N](10)+γ[CC15N](5)                                                                          |
| 553  | 553  | 551  | 552  | ρ[C5N](43)+δin[NC5OC](20)+δin[C2OC](10)+R1[v(C4C5)] (5)                                                                            |
| 463  | 463  | 466  | 468  | δin[NN](17)+δin[C2OC](15)+ρ[C5N](12)+R1[v(C5N)](11)+R1[δring](6)+δ[C9CN](6)+R2[δin[NN]](5)+δin[NC12O](5)                           |
| 442  | 442  | 443  | -    | R1[v(C5N)](19)+R2[δin[C=O17]](12)+δsci[C5NO](8)+δin[C=O16](7)+δin[C2OC](6)+δ[C9CN](6)+R1[δ'ring] (5)+R2[v(C12N13)](5)+R2[δring](5) |
| 400  | 401  | 405  | 405  | δin[C=O17](33)+R1[v(C5N)](11)+R2[δin(C=O16)](10)+R2[v(C12N13)](6)+R2[v(C14C)](6)+R1[δring](5)+R2[v(NC15)] (5)                      |
| 378  | 379  | -    | 387  | τ[C9N](28)+R1[τ'ring](17)+R1[τring](13)+δoop[C2C9](10)+ω[NC9C](9)+δoop[CN](8)+δoop[NN](6)                                          |
| 298  | 299  | -    | 298  | τ[NN] (41)+δoop[NN](20)+τ[C9C](12)+ R2[τ'ring](9)+τ[C9N] ( 8)                                                                      |
| 293  | 294  | -    | -    | R2[δin[NN]](18)+δin[C=O16](17)+R1[δin[C5N]](13)+δin[C2OC](12)+ρ[C5N](7)+R2[v(NC12)](6)+R1[v(C2C9)](6)                              |
| 222  | 223  | -    | 215  | R1[δin[C5N]](33)+ρ[C5N](17)+δ[C9CN](12)+R1[v(C2C9)](6)+R1[δring] (5)                                                               |
| 194  | 195  | -    | -    | δoop[CN](56)+τ[NN](13)+τ[C9N](7)+δoop[C2C9](6)                                                                                     |
| 179  | 180  | -    | 189  | R2[τ'ring] (77)+δoop[NN](16)                                                                                                       |
| 142  | 143  | -    | -    | R2[τring] (54)+δoop[NH](36)                                                                                                        |
| 136  | 137  | -    | 159  | R2[δin[NN]](30)+δin[NN](21)+R1[δin[C5N]](18)+δin[C2OC](13)                                                                         |
| 121  | 121  | -    | -    | R2[τring](34)+δoop[NH](21)+δoop[C2C9](10)+τ[C5N](10)+δoop[CN](9)+δoop[NN](5)                                                       |
| 75   | 76   | -    | 77   | τ[C5N](42)+δoop[NN](32)+R2[τ'ring] (9)                                                                                             |
| 51   | 51   | -    | -    | δ[C9CN](36)+δin[C2OC](29)+R2[δin[NN]](17)+δin[NN] ( 6)+R1[δin[C5N]](5)                                                             |

|    |    |   |   |                                                                                                                               |
|----|----|---|---|-------------------------------------------------------------------------------------------------------------------------------|
| 44 | 44 | - | - | $\delta_{oop}[\text{NN}](30)+\tau[\text{C5N}](20)+\tau[\text{C9C}](17)+\text{R2}[\tau'ring](11)+\delta_{oop}[\text{C2C9}](8)$ |
| 24 | 25 | - | - | $\delta_{oop}[\text{NN}](37)+\tau[\text{C9C}](20)+\tau[\text{NN}](19)+\tau[\text{C9N}](7)+\text{R2}[\tau ring](5)$            |

**Table S3** Observed and calculated vibrational wavenumbers (in  $\text{cm}^{-1}$ ) of FT-IR, FT-RAMAN spectra of LP

| Unscaled DFT | Scaled DFT | IR   | Raman | PED assignment (% contribution)                                                                                                                                                                                                                                                                             |
|--------------|------------|------|-------|-------------------------------------------------------------------------------------------------------------------------------------------------------------------------------------------------------------------------------------------------------------------------------------------------------------|
| 3567         | 3391       | 3211 | -     | R3[ $\nu_{as}(\text{NH}_2)$ ](100)                                                                                                                                                                                                                                                                          |
| 3490         | 3322       | 3153 | -     | R3[ $\nu_s(\text{NH}_2)$ ](100)                                                                                                                                                                                                                                                                             |
| 3132         | 3000       | 3053 | 3006  | R3[ $\nu_{as}(\text{C28H}_2)$ ](87)+ R3[ $\nu_{as}(\text{C27H}_2)$ ](6)                                                                                                                                                                                                                                     |
| 3123         | 2991       | 3008 | 2983  | R3[ $\nu_{as}(\text{C26H}_2)$ ](90)                                                                                                                                                                                                                                                                         |
| 3116         | 2985       |      |       | R3[ $\nu(\text{C25H})$ ](91)+R3[ $\nu_{as}(\text{C26H}_2)$ ](5)                                                                                                                                                                                                                                             |
| 3110         | 2980       | 2981 | -     | R3[ $\nu_s(\text{C27H}_2)$ ](82)+R3[ $\nu_s(\text{C28H}_2)$ ](10)                                                                                                                                                                                                                                           |
| 3072         | 2945       | 2952 | 2950  | R3[ $\nu_s(\text{C28H}_2)$ ](95)                                                                                                                                                                                                                                                                            |
| 3065         | 2938       | 2910 | 2933  | R3[ $\nu_s(\text{C27H}_2)$ ](96)                                                                                                                                                                                                                                                                            |
| 3030         | 2907       | 2877 | 2874  | R3[ $\nu_s(\text{C26H}_2)$ ](97)                                                                                                                                                                                                                                                                            |
| 1764         | 1729       | 1614 | 1625  | R3[ $\nu(\text{CO40})$ ](60)+R3[ $\nu(\text{CO39})$ ](28)+R3[ $\delta_{sci}(\text{C24CO})$ ](8)                                                                                                                                                                                                             |
| 1576         | 1549       | 1554 | 1549  | R3[ $\delta_{in}(\text{NH}_2)$ ](87)+R3[ $\omega(\text{NH}_2)$ ](5)                                                                                                                                                                                                                                         |
| 1513         | 1489       | -    | -     | R3[ $\delta(\text{C28H}_2)$ ](54)+R3[ $\delta(\text{C26H}_2)$ ](24)+R3[ $\delta(\text{C27H}_2)$ ](15)                                                                                                                                                                                                       |
| 1501         | 1478       | 1473 | 1472  | R3[ $\delta(\text{C28H}_2)$ ](40)+R3[ $\delta(\text{C27H}_2)$ ](36)+R3[ $\delta(\text{C27H}_2)$ ](21)                                                                                                                                                                                                       |
| 1494         | 1471       | 1448 | 1453  | R3[ $\delta(\text{C27H}_2)$ ](60)+R3[ $\delta(\text{C26H}_2)$ ](37)                                                                                                                                                                                                                                         |
| 1388         | 1368       | 1375 | 1375  | R3[ $\omega(\text{C28H}_2)$ ](61)+R3[ $\nu(\text{C27C28})$ ](7)+R3[ $\omega(\text{NH}_2)$ ](7)<br>+R3[ $\omega(\text{C26H}_2)$ ](7)+R3[ $\gamma(\text{NH}_2)$ ](6)                                                                                                                                          |
| 1361         | 1342       | -    | 1349  | R3[ $\omega(\text{C27H}_2)$ ](38)+R3[ $\omega(\text{C26H}_2)$ ](14)+R3[ $\gamma(\text{C27H}_2)$ ](11)+R3[ $\nu(\text{C26C27})$ ](8)+R3[ $\gamma(\text{C26H}_2)$ ](8)+R3[ $\gamma(\text{C28H}_2)$ ](7)                                                                                                       |
| 1350         | 1332       | -    | -     | R3[ $\delta(\text{NC25C26})$ ](19)+R3[ $\omega(\text{C27H}_2)$ ](10)+R3[ $\omega(\text{C28H}_2)$ ](10)+R3[ $\omega(\text{NH}_2)$ ](8)+R3[ $\nu(\text{CO39})$ ](8)+R3[ $\omega(\text{C26H}_2)$ ](7)+R3[ $\nu(\text{C25C})$ ](6)<br>+R3[ $\gamma(\text{C27H}_2)$ ](6)+R3[ $\gamma(\text{NH}_2)$ ](5)          |
| 1327         | 1310       | 1319 | 1316  | R3[ $\omega(\text{C26H}_2)$ ](22)+R3[ $\delta(\text{NC25C26})$ ](20)+R3[ $\omega(\text{C27H}_2)$ ](16)+<br>R3[ $\gamma(\text{NH}_2)$ ](11)+R3[ $\nu(\text{CO39})$ ](9)                                                                                                                                      |
| 1318         | 1301       | 1292 | 1286  | R3[ $\nu(\text{CO39})$ ](21)+[ $\omega(\text{C26H}_2)$ ](13)+R3[ $\nu(\text{CO40})$ ](12)+<br>R3[ $\gamma(\text{C28H}_2)$ ](11)+R3[ $\omega(\text{C27H}_2)$ ](6)+R3[ $\delta_{oop}(\text{C25H})$ ](5)+<br>R3[ $\omega(\text{NH}_2)$ ](5)+R3[ $\delta(\text{NC25C26})$ ](5)+R3[ $\omega(\text{C28H}_2)$ ](5) |
| 1288         | 1272       | -    | 1266  | R3[ $\nu(\text{CO39})$ ](14)+R3[ $\gamma(\text{C28H}_2)$ ](12)+R3[ $\delta_{oop}(\text{C25H})$ ](11)+<br>R3[ $\gamma(\text{C26H}_2)$ ](10)+R3[ $\nu(\text{C24C})$ ](9)+R3[ $\nu(\text{C25C})$ ](8)<br>+R3[ $\omega(\text{C26H}_2)$ ](6)+[ $\gamma(\text{C4H}_2)$ ](6)+[ $\omega(\text{C2NC})$ ](5)          |
| 1278         | 1263       | -    | -     | R3[ $\delta_{oop}(\text{C25H})$ ](31)+R3[ $\gamma(\text{C27CN})$ ](29)+R3[ $\gamma(\text{C27C})$ ](7)<br>+R3[ $\rho(\text{C26H}_2)$ ](6)                                                                                                                                                                    |
| 1263         | 1248       | 1253 | 1238  | R3[ $\delta(\text{NC25C26})$ ](23)+R3[ $\gamma(\text{NH}_2)$ ](18)+R3[ $\gamma(\text{C26H}_2)$ ](9)<br>+R3[ $\rho(\text{C28H}_2)$ ](8)+R3[ $\rho(\text{C27H}_2)$ ](8)+R3[ $\omega(\text{C28H}_2)$ ](6)                                                                                                      |
| 1211         | 1197       | -    | -     | R3[ $\omega(\text{NH}_2)$ ](40)+R3[ $\gamma(\text{C27H}_2)$ ](16)+R3[ $\omega(\text{C28H}_2)$ ](8)<br>+R3[ $\omega(\text{C27H}_2)$ ](5)+R3[ $\nu(\text{C27C28})$ ](5)                                                                                                                                       |
| 1190         | 1177       | 1168 | 1175  | R3[ $\gamma(\text{C26H}_2)$ ](23)+R3[ $\nu(\text{C26C27})$ ](11)+R3[ $\nu(\text{C26C27})$ ](10)<br>+R3[ $\omega(\text{C27H}_2)$ ](8)+R3[ $\gamma(\text{C27H}_2)$ ](7)+R3[ $\omega(\text{NH}_2)$ ](6)<br>+R3[ $\delta(\text{NC25C26})$ ](6)+R3[ $\rho(\text{C28H}_2)$ ](5)                                   |

|      |      |      |      |                                                                                                                                                                                                                                                                                            |
|------|------|------|------|--------------------------------------------------------------------------------------------------------------------------------------------------------------------------------------------------------------------------------------------------------------------------------------------|
| 1133 | 1122 | -    | -    | R3[ $\delta$ oop(C25H)](32)+R3[ $\gamma$ (NH <sub>2</sub> )](27)+R3[ $\gamma$ (C27H <sub>2</sub> )](8)                                                                                                                                                                                     |
| 1090 | 1080 | 1083 | 1083 | R3[ $\rho$ (C26H <sub>2</sub> )](18)+R3[ $\gamma$ (C26H <sub>2</sub> )](18)+R3[ $\rho$ (C28H <sub>2</sub> )](11)<br>+R3[ $\delta$ (NC25C26)](10)+<br>R3[ $\nu$ (C25C)](8)+R3[ $\rho$ (C27H <sub>2</sub> )](7)+R3[ $\nu$ (C25N)](5)                                                         |
| 1039 | 1030 | 1033 | 1033 | R3[ $\nu$ (C4C5)](20)+R3[ $\nu$ (C26C27)](14)+R3[ $\nu$ (C25C)](11)+<br>R3[ $\delta$ ring](10)+R3[ $\gamma$ (NH <sub>2</sub> )](6)+R3[ $\omega$ (C26H <sub>2</sub> )](5)+R3[ $\omega$ (C27H <sub>2</sub> )](5)+<br>R3[ $\rho$ (C26H <sub>2</sub> )](5)+R3[ $\nu$ (C28N)](5)                |
| 1014 | 1006 | 981  | 985  | R3[ $\nu$ (C28N)](23)+R3[ $\rho$ (C27H <sub>2</sub> )](14)+R3[ $\nu$ (C25C)](12)<br>+R3[ $\delta$ 'ring](11)+R3[ $\nu$ (C25N)](9)+R3[ $\nu$ (C27C28)](8)+R3[ $\gamma$ (NH <sub>2</sub> )](6)<br>+R3[ $\delta$ ring](6)                                                                     |
| 955  | 949  | 946  | 951  | R3[ $\rho$ (C26H <sub>2</sub> )](15)+R3[ $\delta$ oop(C25C24)](13)+R3[ $\rho$ (C28H <sub>2</sub> )](12)<br>+R3[ $\gamma$ (C28H <sub>2</sub> )](11)+R3[ $\rho$ (NH <sub>2</sub> )](10)+R3[ $\gamma$ (C27H <sub>2</sub> )](8)<br>+R3[ $\nu$ (C25C)](6)+R3[ $\gamma$ (C26H <sub>2</sub> )](5) |
| 935  | 929  | -    | 920  | R3[ $\nu$ (C28N)](16)+R3[ $\nu$ (C26C27)](15)+R3[ $\nu$ (C25C)](13)<br>+R3[ $\nu$ (C24C)](9)+R3[ $\gamma$ (C27H <sub>2</sub> )](8)+R3[ $\rho$ (NH <sub>2</sub> )](6)                                                                                                                       |
| 909  | 904  | 902  | 898  | R3[ $\nu$ (C27C28)](43)+R3[ $\nu$ (C26C27)](33)+R3[ $\nu$ (C5N)](7)                                                                                                                                                                                                                        |
| 889  | 884  | 860  | 866  | R3[ $\nu$ (C28N)](29)+R3[ $\rho$ (C26H <sub>2</sub> )](11)+R3[ $\rho$ (C27H <sub>2</sub> )](10)<br>+R3[ $\nu$ (C25N)](6)                                                                                                                                                                   |
| 845  | 840  | 846  | 842  | R3[ $\nu$ (C25N)](19)+R3[ $\rho$ (C28H <sub>2</sub> )](19)+R3[ $\rho$ (C27H <sub>2</sub> )](14)+<br>R3[ $\delta$ sci(C24CO)](8)+R3[ $\nu$ (C28N)](8)+R3[ $\nu$ (C26C27)](6)                                                                                                                |
| 819  | 815  |      |      | R3[ $\nu$ (C24C)](26)+R3[ $\delta$ sci(C24CO)](17)+R3[ $\rho$ (C24CO)](17)+<br>R3[ $\nu$ (C25N)](9)+R3[ $\rho$ (C26H <sub>2</sub> )](8)                                                                                                                                                    |
| 790  | 787  | 694  | -    | R3[ $\nu$ (C25N)](41)+R3[ $\rho$ (C24CO)](19)+R3[ $\rho$ (NH <sub>2</sub> )](11)                                                                                                                                                                                                           |
| 764  | 761  | -    | -    | R3[ $\delta$ oop(C24C)](41)+R3[ $\rho$ (NH <sub>2</sub> )](22)+R3[ $\delta$ oop(C25H)](10)+<br>R3[ $\delta$ oop(C25C24)](8)+R3[ $\rho$ (C27H <sub>2</sub> )](6)+R3[ $\delta$ (NC25C26)](5)                                                                                                 |
| 653  | 652  | 640  | 642  | R3[ $\delta$ ring](44)+R3[ $\delta$ 'ring](9)+R3[ $\rho$ (C28H <sub>2</sub> )](7)+R3[ $\delta$ oop(C24C)](7)+<br>R3[ $\rho$ (C24CO)](6)+R3[ $\rho$ (C26H <sub>2</sub> )](6)+R3[ $\rho$ (NH <sub>2</sub> )](5)                                                                              |
| 604  | 603  | -    | -    | R3[ $\nu$ (C24C)](30)+R3[ $\delta$ sci(C24CO)](29)+R3[ $\delta$ oop(C24C)](11)+<br>R3[ $\delta$ oop(C25C24)](10)+R3[ $\nu$ (C25C)](7)                                                                                                                                                      |
| 576  | 576  | 570  | 573  | R3[ $\delta$ 'ring](42)+R3[ $\rho$ (C27H <sub>2</sub> )](18)+R3[ $\rho$ (C26H <sub>2</sub> )](8)+R3[ $\delta$ ring](7)<br>+R3[ $\rho$ (C28H <sub>2</sub> )](7)                                                                                                                             |
| 464  | 465  | 449  | 448  | R3[ $\delta$ sci(C24CO)](18)+R3[ $\delta$ (NC25C26)](17)+R3[ $\nu$ (C24C)](16)<br>+R3[ $\rho$ (C24CO)](16)+R3[ $\nu$ (C25N)](8)+R3[ $\delta$ ring](6)<br>+R3[ $\delta$ oop(C24C)](5)                                                                                                       |
| 315  | 317  |      | 296  | R3[ $\delta$ oop(C25C24)](42)+R3[ $\delta$ oop(C25H)](7)+R3[ $\tau$ 'ring](7)+R3[ $\tau$ ring](6)+<br>R3[ $\delta$ oop(C24C)](6)+R3[ $\rho$ (NH <sub>2</sub> )](5)                                                                                                                         |
| 272  | 274  |      |      | R3[ $\delta$ (NC25C26)](27)+R3[ $\rho$ (C24CO)](15)+R3[ $\delta$ sci(C24CO)](13)+R3[<br>$\rho$ (NH <sub>2</sub> )](9)+R3[ $\tau$ ring](8)+R3[ $\nu$ (NH <sub>2</sub> )](7)                                                                                                                 |
| 184  | 185  |      | 160  | R3[ $\tau$ ring](33)+R3[ $\delta$ oop(C25C24)](27)+R3[ $\delta$ (NC25C26)](22)                                                                                                                                                                                                             |
| 140  | 141  |      | 136  | R3[ $\rho$ (C25NC)](30)+R3[ $\tau$ ring](21)+R3[ $\tau$ 'ring](17)+<br>R3[ $\delta$ oop(C25C24)](8)+R3[ $\nu$ (NH <sub>2</sub> )](5)                                                                                                                                                       |
| 119  | 120  |      | 122  | [ $\tau$ (C24C)](48)+R3[ $\tau$ 'ring](12)+R3[ $\delta$ oop(C25C24)](12)+R3[ $\delta$ (NH <sub>2</sub> )](6)<br>+R3[ $\delta$ (NC25C26)](6)+R3[ $\omega$ (NH <sub>2</sub> )](5)                                                                                                            |

**Table S4** AIM calculation to determine characteristics (bond length (Å), Angles (°)) of hydrogen bonds and ellipticity index ( $\epsilon$ ) around bond critical point (BCP) of NTF-LP cocrystal

| Interactions (D-H...A) | $d_{D-H}$ (Å) | $d_{H...A}$ (Å) | $d_{D-A}$ (Å) | D-H...A(°) | $r_H+r_A$ (Å) | $\epsilon$               |
|------------------------|---------------|-----------------|---------------|------------|---------------|--------------------------|
| N13-H21...O39          | 1.03854       | 1.70992         | 2.66953       | 151.59237  | 2.72          | $2.7826 \times 10^{-2}$  |
| N38-H37...O39          | 1.05855       | 1.74201         | 2.51021       | 125.58419  | 2.72          | $5.9416 \times 10^{-2}$  |
| N38-H37...O16          | 1.05855       | 2.24165         | 3.02014       | 128.83140  | 2.72          | $20.4821 \times 10^{-2}$ |
| C28-H35...O16          | 1.08811       | 2.55865         | 3.26643       | 121.85679  | 2.72          | $47.7837 \times 10^{-2}$ |

**Table S5** Selective local reactive descriptors of interacting atoms of NTF (API) explaining their reactive sites.

| Atoms | $f_k^o$ | $s_k^o$ | $w_k^o$ | Atoms | $f_k^+$ | $s_k^+$ | $w_k^+$ | Atoms | $f_k^-$ | $s_k^-$ | $w_k^-$ |
|-------|---------|---------|---------|-------|---------|---------|---------|-------|---------|---------|---------|
| 1O    | -0.2756 | -0.0278 | -0.5569 | 1O    | 0.0679  | 0.0068  | 0.1372  | 1O    | 0.0426  | 0.0043  | 0.0862  |
| 2O    | -0.2760 | -0.0278 | -0.5577 | 2O    | 0.0563  | 0.0057  | 0.1137  | 2O    | 0.0426  | 0.0043  | 0.0861  |
| 3O    | -0.0743 | -0.0075 | -0.1501 | 3O    | 0.0234  | 0.0024  | 0.0473  | 3O    | 0.0352  | 0.0035  | 0.0712  |
| 4O    | -0.2261 | -0.0228 | -0.4569 | 4O    | 0.0513  | 0.0052  | 0.1036  | 4O    | 0.1221  | 0.0123  | 0.2467  |
| 5O    | -0.2433 | -0.0245 | -0.4916 | 5O    | 0.0622  | 0.0063  | 0.1257  | 5O    | 0.1268  | 0.0128  | 0.2563  |
| 6N    | -0.0770 | -0.0078 | -0.1556 | 6N    | 0.0260  | 0.0026  | 0.0525  | 6N    | 0.0137  | 0.0014  | 0.0277  |
| 7N    | 0.0329  | 0.0033  | 0.0666  | 7N    | 0.0869  | 0.0087  | 0.1755  | 7N    | 0.0152  | 0.0015  | 0.0306  |
| 8N    | -0.0785 | -0.0079 | -0.1585 | 8N    | 0.0576  | 0.0058  | 0.1164  | 8N    | 0.0722  | 0.0073  | 0.1459  |
| 9N    | 0.2111  | 0.0213  | 0.4266  | 9N    | 0.0144  | 0.0014  | 0.0291  | 9N    | 0.0680  | 0.0068  | 0.1374  |
| 10C   | 0.2155  | 0.0217  | 0.4355  | 10C   | 0.0268  | 0.0027  | 0.0541  | 10C   | 0.0311  | 0.0031  | 0.0628  |
| 11C   | 0.1907  | 0.0192  | 0.3853  | 11C   | 0.0143  | 0.0014  | 0.0289  | 11C   | 0.0169  | 0.0017  | 0.0341  |
| 12C   | 0.0094  | 0.0009  | 0.0190  | 12C   | 0.0182  | 0.0018  | 0.0367  | 12C   | 0.0093  | 0.0009  | 0.0188  |
| 13C   | 0.0255  | 0.0026  | 0.0515  | 13C   | 0.0634  | 0.0064  | 0.1280  | 13C   | 0.0570  | 0.0057  | 0.1151  |
| 14C   | 0.0674  | 0.0068  | 0.1362  | 14C   | 0.0506  | 0.0051  | 0.1022  | 14C   | 0.0523  | 0.0053  | 0.1058  |
| 15C   | 0.1183  | 0.0119  | 0.2390  | 15C   | 0.0807  | 0.0081  | 0.1631  | 15C   | 0.0413  | 0.0042  | 0.0835  |
| 16C   | -0.0499 | -0.0050 | -0.1008 | 16C   | 0.0509  | 0.0051  | 0.1029  | 16C   | 0.0656  | 0.0066  | 0.1326  |
| 17C   | -0.0407 | -0.0041 | -0.0822 | 17C   | 0.0823  | 0.0083  | 0.1662  | 17C   | 0.0506  | 0.0051  | 0.1022  |
| 18H   | 0.1688  | 0.0170  | 0.3411  | 18H   | 0.0243  | 0.0024  | 0.0490  | 18H   | 0.0178  | 0.0018  | 0.0359  |
| 19H   | 0.0649  | 0.0065  | 0.1312  | 19H   | 0.0246  | 0.0025  | 0.0497  | 19H   | 0.0112  | 0.0011  | 0.0227  |
| 20H   | 0.0649  | 0.0065  | 0.1312  | 20H   | 0.0246  | 0.0025  | 0.0497  | 20H   | 0.0112  | 0.0011  | 0.0227  |
| 21H   | 0.0417  | 0.0042  | 0.0842  | 21H   | 0.0270  | 0.0027  | 0.0546  | 21H   | 0.0299  | 0.0030  | 0.0605  |
| 22H   | 0.0684  | 0.0069  | 0.1381  | 22H   | 0.0309  | 0.0031  | 0.0625  | 22H   | 0.0353  | 0.0036  | 0.0714  |
| 23H   | 0.0620  | 0.0062  | 0.1254  | 23H   | 0.0357  | 0.0036  | 0.0721  | 23H   | 0.0319  | 0.0032  | 0.0644  |

**Table S6** Selective local reactive descriptors of interacting atoms of LP explaining their reactive sites.

| Atoms | $f_k^o$ | $s_k^o$ | $w_k^o$ | Atoms | $f_k^+$ | $s_k^+$ | $w_k^+$ | Atoms | $f_k^-$ | $s_k^-$ | $w_k^-$ |
|-------|---------|---------|---------|-------|---------|---------|---------|-------|---------|---------|---------|
| 1C    | 0.1852  | 0.0384  | 0.5346  | 1C    | 0.1048  | 0.0217  | 0.3025  | 1C    | 0.0135  | 0.0028  | 0.0390  |
| 2C    | 0.0443  | 0.0092  | 0.1280  | 2C    | 0.0583  | 0.0121  | 0.1682  | 2C    | 0.0257  | 0.0053  | 0.0741  |
| 3C    | -0.0507 | -0.0105 | -0.1463 | 3C    | 0.0186  | 0.0038  | 0.0536  | 3C    | 0.0249  | 0.0052  | 0.0719  |
| 4C    | -0.0496 | -0.0103 | -0.1430 | 4C    | 0.0142  | 0.0029  | 0.0409  | 4C    | 0.0284  | 0.0059  | 0.0818  |
| 5C    | 0.0002  | 0.0001  | 0.0007  | 5C    | 0.0184  | 0.0038  | 0.0532  | 5C    | 0.0794  | 0.0165  | 0.2292  |
| 6H    | 0.0350  | 0.0073  | 0.1011  | 6H    | 0.0380  | 0.0079  | 0.1096  | 6H    | 0.0626  | 0.0130  | 0.1807  |
| 7H    | 0.0177  | 0.0037  | 0.0510  | 7H    | 0.0362  | 0.0075  | 0.1046  | 7H    | 0.0619  | 0.0128  | 0.1788  |
| 8H    | 0.0491  | 0.0102  | 0.1416  | 8H    | 0.0144  | 0.0030  | 0.0416  | 8H    | 0.0221  | 0.0046  | 0.0639  |
| 9H    | 0.0274  | 0.0057  | 0.0791  | 9H    | 0.0279  | 0.0058  | 0.0804  | 9H    | 0.0637  | 0.0132  | 0.1838  |
| 10H   | 0.0409  | 0.0085  | 0.1180  | 10H   | 0.0076  | 0.0016  | 0.0219  | 10H   | 0.0208  | 0.0043  | 0.0600  |
| 11H   | -0.0276 | -0.0057 | -0.0797 | 11H   | 0.0227  | 0.0047  | 0.0656  | 11H   | 0.1697  | 0.0352  | 0.4899  |

---

|     |         |         |         |     |        |        |        |     |        |        |        |
|-----|---------|---------|---------|-----|--------|--------|--------|-----|--------|--------|--------|
| 12H | 0.0272  | 0.0056  | 0.0786  | 12H | 0.0237 | 0.0049 | 0.0685 | 12H | 0.0768 | 0.0159 | 0.2215 |
| 13H | 0.0521  | 0.0108  | 0.1503  | 13H | 0.0303 | 0.0063 | 0.0876 | 13H | 0.2493 | 0.0516 | 0.7194 |
| 14H | 0.1110  | 0.0230  | 0.3204  | 14H | 0.0235 | 0.0049 | 0.0679 | 14H | 0.0295 | 0.0061 | 0.0851 |
| 15N | 0.0157  | 0.0033  | 0.0453  | 15N | 0.0250 | 0.0052 | 0.0723 | 15N | 0.0132 | 0.0027 | 0.0382 |
| 16O | -0.2885 | -0.0598 | -0.8327 | 16O | 0.1480 | 0.0307 | 0.4270 | 16O | 0.0195 | 0.0040 | 0.0562 |
| 17O | -0.1856 | -0.0384 | -0.5355 | 17O | 0.3883 | 0.0804 | 1.1205 | 17O | 0.0310 | 0.0064 | 0.0894 |

---
